# Supplementary material for: Genome sequences of wild and domestic bactrian camels
Source: PubMed Central journal article supplement — Nat Commun. 2012 Nov 13;3:1202–. doi: 10.1038/ncomms2192 (PMC3514880; doi:10.1038/ncomms2192), 2012-11-13
Supplement: ncomms2192-s1.pdf [file ncomms2192-s1.pdf]

**Supplementary Figures and Tables**  
**for**  
**Genome sequences of wild and domestic bactrian camels**

**The Bactrian camels Genome Sequencing Consortium**



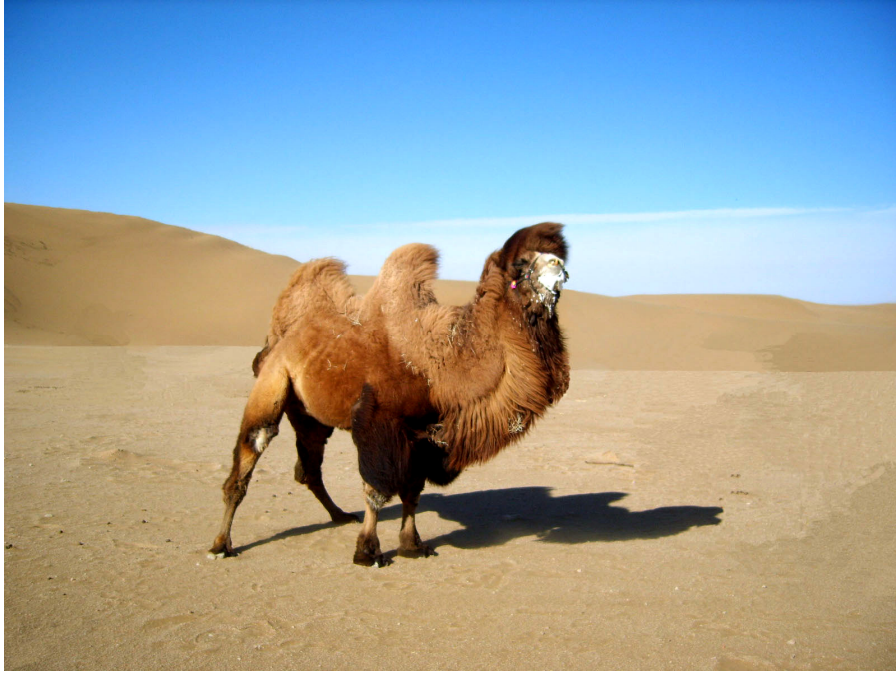

**Supplementary Figure S2. Picture of the domestic bactrian camel sequenced in this study.**

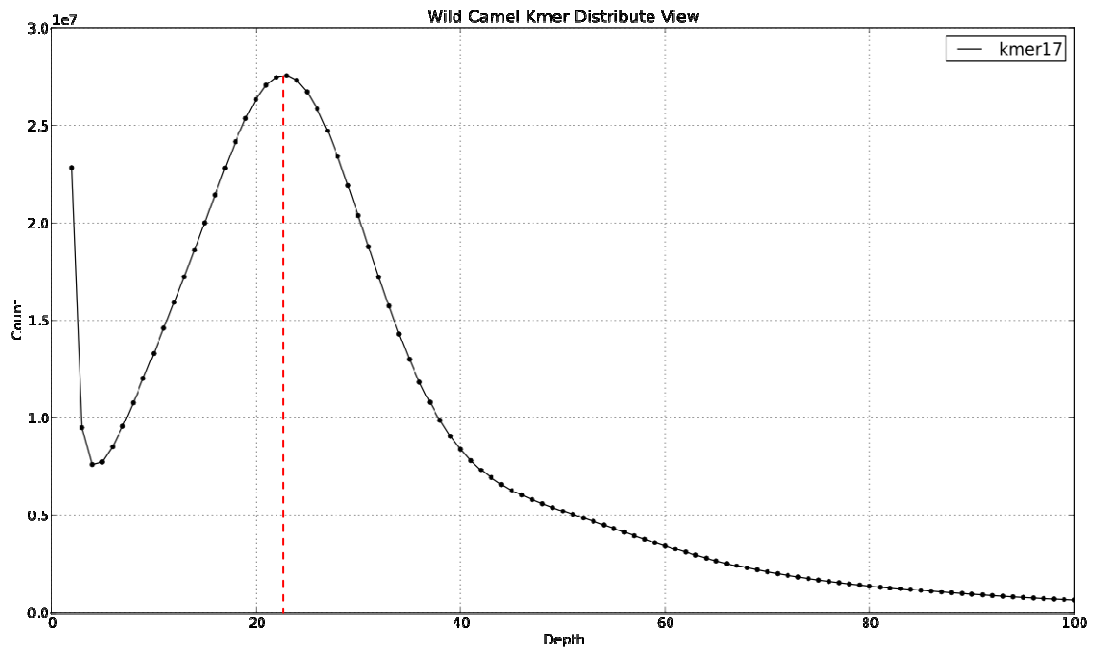

**Supplementary Figure S3. Distribution of 17-mer frequency in the raw reads.** The depth at the peak of the frequency distribution is 23×.

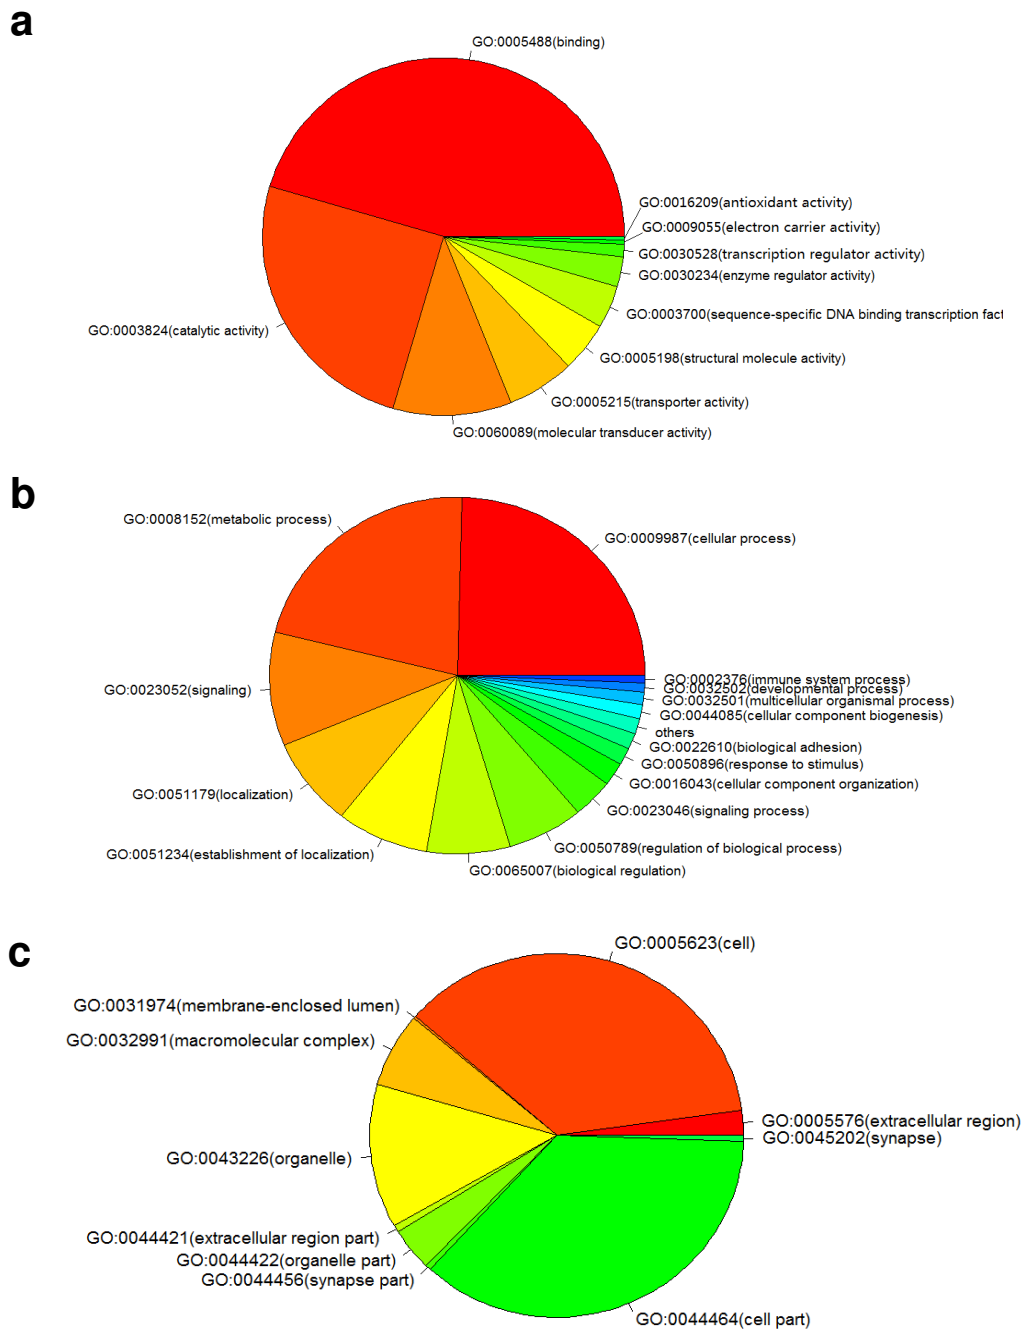

**Supplementary Figure S4. Gene Ontology (GO) assignment for the camel genes.**

There are 12,050 genes corresponding to at least one GO term, which is represented by the second layer in the GO hierarchy. a) Molecular functions (MF). b) Biological processes (BP). c) Cellular components (CC).

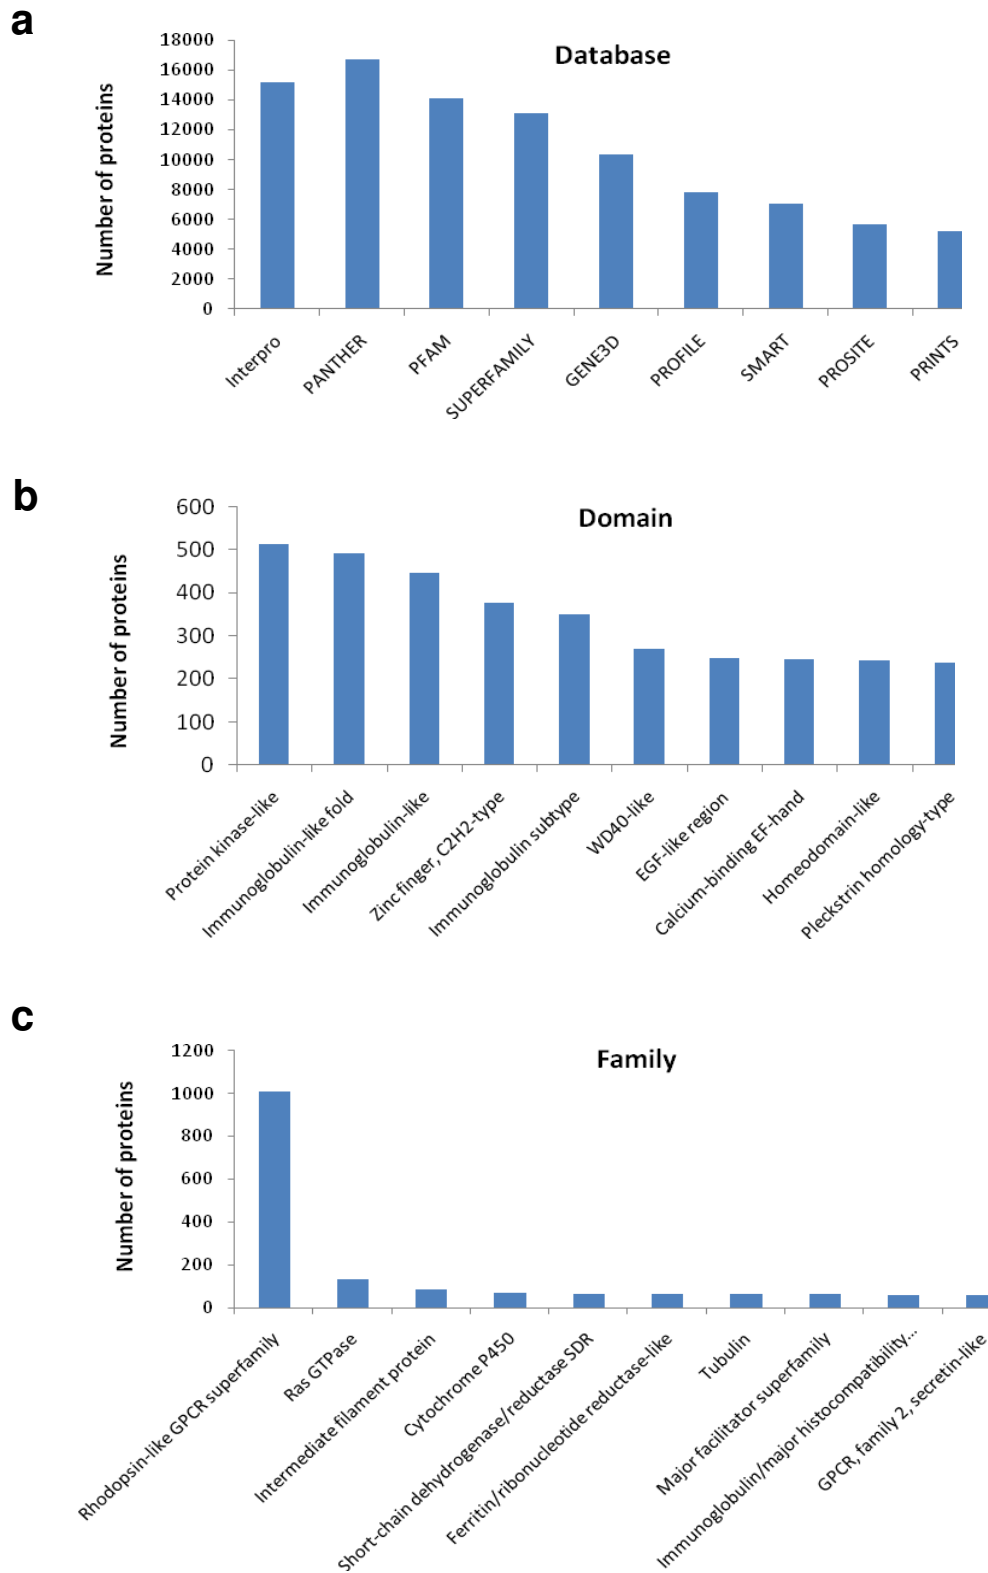

**Supplementary Figure S5. Number of camel proteins annotated by InterProScan.**

a) Databases searched by InterProScan. b) Top 10 protein domains found in the camel genome. c) Top 10 protein families found in the camel genome.

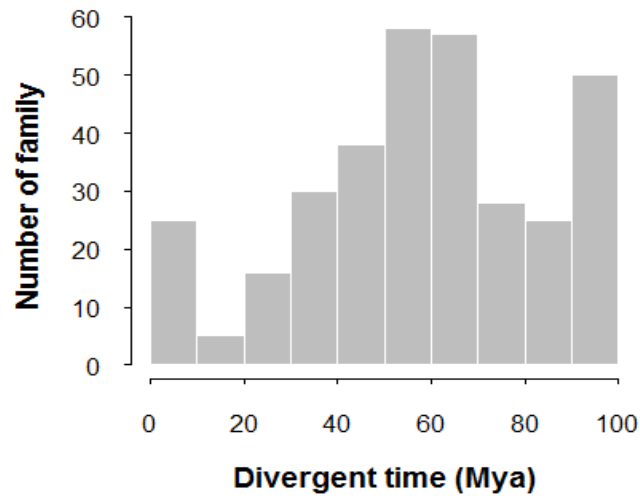

**Supplementary Figure S6. Distribution of the divergence time between camel and cattle.** The divergence time was estimated based on 332 constantly evolving ortholog families in mammals. The distribution indicates that cattle and camel lineages were separated about  $57.5 \pm 1.5$  (mean  $\pm$  standard error) million years ago (Mya).

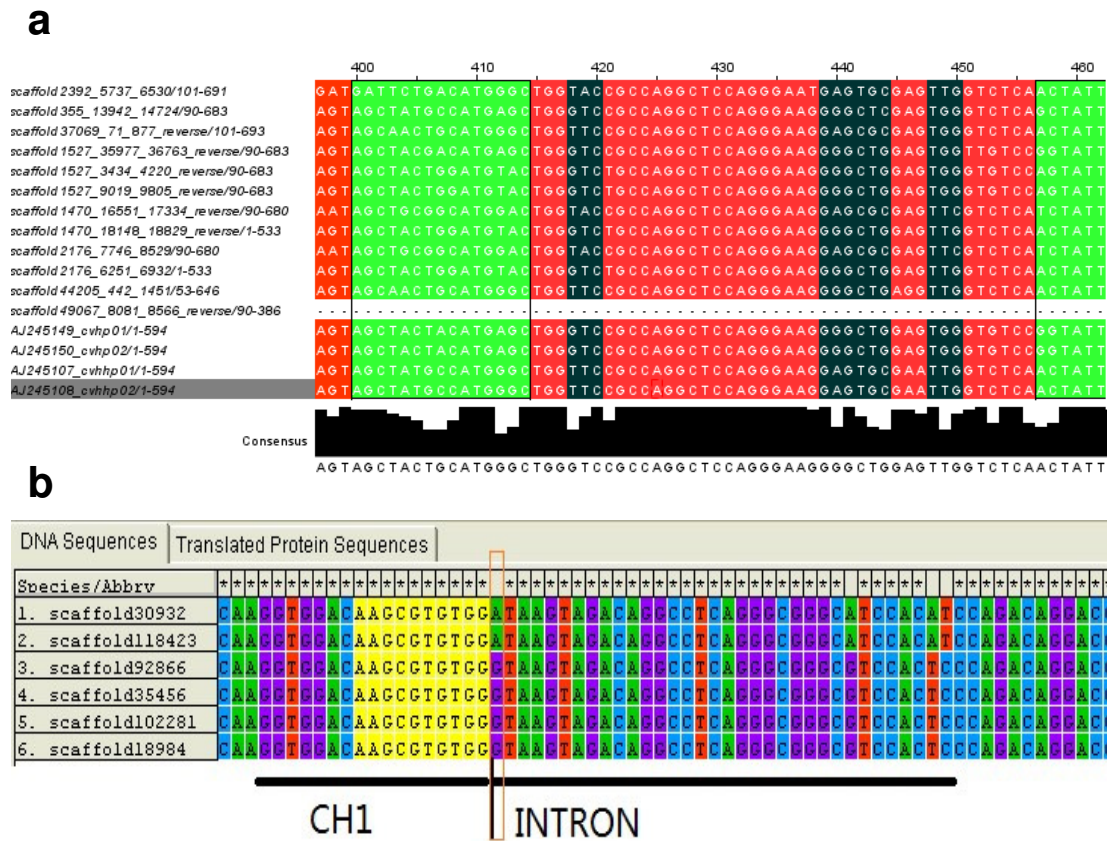

**Supplementary Figure S7. Gene segments of heavy-chain antibodies (HCABs).** a) Multiple alignment of FR2 regions in VH (heavy-chain variable region of conventional antibodies) and VHH (heavy-chain variable region of HCABs) sequences. Codons in black denote the site mutations of V37F(Y), G44E, L45R and W47G, which are considered to be critical for the formation of HCABs. Note that we defined the V regions in scaffold 44205 and scaffold 49067 to be VHH, though only two of the four mutation sites occur. Two VH (AJ245149, AJ245150) and two VHH (AJ245107, AJ245108) sequences from Genbank were used to locate the FR2 region and mutation sites. b) Multiple alignment of C $\gamma$  gene sequences. Nucleotide in red frame indicates a splice site mutation of “G to A” at the CH1/INTRON boundary, thus the CH1 region is completely removed in HCABs.



## Supplementary Tables

**Supplementary Table S1. Differences between wild and domestic bactrian camels.**

| Body index/Figure    | Domestic bactrian camel                    |              | Wild bactrian camel                   |             |
|----------------------|--------------------------------------------|--------------|---------------------------------------|-------------|
|                      | Male(n=15)                                 | Female(n=15) | Male(n=1)                             | Female(n=4) |
| Weight (kg)          | 166.0±0.30                                 | 164.0±0.3    | 189.5                                 | 180.3±5.9   |
| Body length (cm)     | 148.3±.27                                  | 146.0±0.4    | 146.0                                 | 142.2±1.9   |
| Chest width (cm)     | 46.5±0.05                                  | 41.4±0.4     | 46.0                                  | 43.8±0.8    |
| Chest depth (cm)     | 82.8±0.21                                  | 78.8±0.3     | 85.0                                  | 78.6±1.9    |
| Ankle perimeter (cm) | 23.0±0.40                                  | 19.1±0.1     | 22.0                                  | 17.4±0.2    |
| Leg length (cm)      | 89.8±0.10                                  | 87.2±0.1     | 104.5                                 | 101.7±0.2   |
| Hump                 | hypertrophy and plump                      |              | underneath is round<br>Pointed in top |             |
| Figure               | short and obesity                          |              | tall and big                          |             |
| Color                | claret, black, gray,<br>pale yellow, white |              | gray                                  |             |
| Tufts                | dense                                      |              | very sparse                           |             |
| Chaetae              | fluffy and long                            |              | thick and short                       |             |
| Limbs                | stout                                      |              | slender                               |             |
| Sole                 | round                                      |              | oval                                  |             |
| Toenail              | bald                                       |              | special pointed                       |             |
| Running speed        | slow                                       |              | fast                                  |             |

**Supplementary Table S2. Summary of raw data.**

| Library Type     | Platform                          | Animal   | Insert size (bp) | Avg read length (bp) | Total bases (GB) |
|------------------|-----------------------------------|----------|------------------|----------------------|------------------|
| 500bp paired-end | Illumina Genome Analyzer          | domestic | 430              | 94.5                 | 49               |
| 500bp paired-end | Illumina Genome Analyzer          | wild     | 430              | 95.5                 | 145              |
| 3kb mate-pair    | Illumina Genome Analyzer          | wild     | 2800             | 93.4                 | 26               |
| 10kb mate-pair   | Applied Biosystems SOLiD          | wild     | 8900             | 35.0                 | 27               |
| 20kb mate-pair   | Roche Genome Sequencer FLX System | wild     | 18800            | 177.7                | 0.6              |

**Supplementary Table S3. Sequencing depth and coverage for the assembled scaffolds.**

| Library Type     | Platform                          | Animal   | Reserved base (GB) | Depth | Coverage (%) |
|------------------|-----------------------------------|----------|--------------------|-------|--------------|
| 500bp paired-end | Illumina Genome Analyzer          | domestic | 47                 | 24    | 97.29        |
| 500bp paired-end | Illumina Genome Analyzer          | wild     | 114                | 57    | 97.66        |
| 3kb mate-pair    | Illumina Genome Analyzer          | wild     | 16                 | 9     | 83.71        |
| 10kb mate-pair   | Applied Biosystems SOLiD          | wild     | 10                 | 8     | 62.0         |
| 20kb mate-pair   | Roche Genome Sequencer FLX System | wild     | 0.3                | 2     | 7.8          |

**Supplementary Table S4. Genome size estimation based on C values.**

|                                                       | Reported C value (pico) | Reported Genome size (Gb) | Gb/pico | Gb of 2.41 pico | Gb of 2.86 pico |
|-------------------------------------------------------|-------------------------|---------------------------|---------|-----------------|-----------------|
| Human                                                 | 3.5                     | 3.2                       | 0.91    | 2.20            | 2.62            |
| Rat                                                   | 3.1                     | 2.8                       | 0.90    | 2.18            | 2.58            |
| mouse                                                 | 3.3                     | 2.5                       | 0.76    | 1.83            | 2.17            |
| Cattle                                                | 3.7                     | 2.87                      | 0.78    | 1.87            | 2.22            |
| Pig                                                   | 3.2                     | 2.72                      | 0.85    | 2.05            | 2.43            |
| Average value of estimated genome size for camel (Gb) |                         |                           |         | 2.02            | 2.40            |

**Supplementary Table S5. Summary of repeat sequences.**

| Elements        | Number of elements | Length occupied (bp) | Percentage of sequence |
|-----------------|--------------------|----------------------|------------------------|
| SINES:          | 560273             | 79896785             | 3.92%                  |
| Alu/B1          | 0                  | 0                    | 0.00%                  |
| MIRs            | 460330             | 68890993             | 3.38%                  |
| LINEs:          | 883074             | 394112453            | 19.32%                 |
| LINE1           | 552674             | 302328505            | 14.82%                 |
| LINE2           | 280625             | 79958902             | 3.92%                  |
| L3/CR1          | 38504              | 8972347              | 0.44%                  |
| RTE             | 10913              | 2766794              | 0.14%                  |
| LTR elements:   | 321595             | 118418136            | 5.81%                  |
| ERVL            | 76625              | 33162713             | 1.63%                  |
| ERVL-MaLRs      | 133362             | 47148327             | 2.31%                  |
| ERV_class I     | 77025              | 33253620             | 1.63%                  |
| ERV_class II    | 23095              | 1938661              | 0.10%                  |
| DNA elements:   | 282696             | 61204314             | 3.00%                  |
| hAT-Charlie     | 175700             | 34335816             | 1.68%                  |
| TcMar-Tigger    | 44496              | 13820703             | 0.68%                  |
| Unclassified:   | 6050               | 1318304              | 0.06%                  |
| Small RNA:      | 101947             | 11120002             | 0.55%                  |
| Satellites:     | 3319               | 379039               | 0.02%                  |
| Simple repeats: | 244141             | 11307451             | 0.55%                  |
| Low complexity: | 225901             | 9079366              | 0.45%                  |

**Supplementary Table S6. Syntenic blocks between camel and other mammals.**

| Species | Number of syntenic blocks | Coverage in the camel genome (Mb) | Number of covered orthologs |
|---------|---------------------------|-----------------------------------|-----------------------------|
| Human   | 1,044                     | 1,058                             | 12,009                      |
| Mouse   | 1,070                     | 1,025                             | 11,653                      |
| Cattle  | 1,121                     | 1,008                             | 11,197                      |
| Dog     | 1,005                     | 1,005                             | 10,929                      |

**Supplementary Table S7. KEGG pathway enrichment for rapidly evolving genes in the camel genome.**

| Pathway                                                           | Total genes | Rapidly evolving genes | Odds ratio | P-value  | FDR      |
|-------------------------------------------------------------------|-------------|------------------------|------------|----------|----------|
| ko00908 Zeatin biosynthesis                                       | 1           | 1                      | 7.63       | 0.00E+00 | 0.00E+00 |
| ko03015 mRNA surveillance pathway                                 | 63          | 25                     | 3.05       | 2.66E-08 | 3.83E-06 |
| ko05200 Pathways in cancer                                        | 242         | 61                     | 1.94       | 1.09E-07 | 6.28E-06 |
| ko04120 Ubiquitin mediated proteolysis                            | 92          | 31                     | 2.59       | 9.08E-08 | 6.54E-06 |
| ko04141 Protein processing in endoplasmic reticulum               | 124         | 38                     | 2.36       | 8.65E-08 | 8.30E-06 |
| ko03013 RNA transport                                             | 113         | 35                     | 2.38       | 1.87E-07 | 8.97E-06 |
| ko04310 Wnt signaling pathway                                     | 110         | 34                     | 2.37       | 2.85E-07 | 1.17E-05 |
| ko04721 Synaptic vesicle cycle                                    | 49          | 19                     | 2.97       | 1.31E-06 | 4.72E-05 |
| ko05166 HTLV-I infection                                          | 189         | 48                     | 1.95       | 1.56E-06 | 4.99E-05 |
| ko05220 Chronic myeloid leukemia                                  | 53          | 19                     | 2.75       | 5.56E-06 | 1.60E-04 |
| ko03040 Spliceosome                                               | 102         | 29                     | 2.18       | 1.16E-05 | 2.79E-04 |
| ko05215 Prostate cancer                                           | 73          | 23                     | 2.41       | 1.09E-05 | 2.85E-04 |
| ko04961 Endocrine and other factor-regulated calcium reabsorption | 36          | 14                     | 2.98       | 2.06E-05 | 4.23E-04 |
| ko04666 Fc gamma R-mediated phagocytosis                          | 57          | 19                     | 2.55       | 1.97E-05 | 4.36E-04 |
| ko05211 Renal cell carcinoma                                      | 45          | 16                     | 2.72       | 2.73E-05 | 5.24E-04 |
| ko04722 Neurotrophin signaling pathway                            | 83          | 24                     | 2.22       | 3.90E-05 | 7.01E-04 |
| ko05210 Colorectal cancer                                         | 42          | 15                     | 2.73       | 4.15E-05 | 7.03E-04 |
| ko04144 Endocytosis                                               | 151         | 37                     | 1.88       | 4.51E-05 | 7.21E-04 |
| ko03022 Basal transcription factors                               | 27          | 11                     | 3.12       | 6.47E-05 | 8.88E-04 |
| ko04910 Insulin signaling pathway                                 | 100         | 27                     | 2.07       | 5.97E-05 | 9.05E-04 |
| ko05223 Non-small cell lung cancer                                | 39          | 14                     | 2.75       | 6.31E-05 | 9.09E-04 |
| ko05214 Glioma                                                    | 48          | 16                     | 2.55       | 7.12E-05 | 9.32E-04 |
| ko00020 Citrate cycle (TCA cycle)                                 | 28          | 11                     | 3.00       | 9.98E-05 | 1.20E-03 |
| ko04664 Fc epsilon RI signaling pathway                           | 49          | 16                     | 2.50       | 9.58E-05 | 1.20E-03 |

|         |                                             |     |    |      |          |          |
|---------|---------------------------------------------|-----|----|------|----------|----------|
| ko04012 | ErbB signaling pathway                      | 60  | 18 | 2.30 | 1.54E-04 | 1.78E-03 |
| ko05221 | Acute myeloid leukemia                      | 42  | 14 | 2.55 | 1.69E-04 | 1.87E-03 |
| ko00051 | Fructose and mannose metabolism             | 30  | 11 | 2.80 | 2.20E-04 | 2.35E-03 |
| ko04520 | Adherens junction                           | 57  | 17 | 2.28 | 2.37E-04 | 2.44E-03 |
| ko03050 | Proteasome                                  | 39  | 13 | 2.55 | 2.60E-04 | 2.58E-03 |
| ko04150 | mTOR signaling pathway                      | 36  | 12 | 2.55 | 4.01E-04 | 3.85E-03 |
| ko05162 | Measles                                     | 80  | 21 | 2.01 | 4.67E-04 | 4.34E-03 |
| ko05212 | Pancreatic cancer                           | 46  | 14 | 2.33 | 5.24E-04 | 4.72E-03 |
| ko03010 | Ribosome                                    | 97  | 24 | 1.89 | 5.81E-04 | 5.07E-03 |
| ko04725 | Cholinergic synapse                         | 88  | 22 | 1.91 | 7.67E-04 | 6.31E-03 |
| ko04530 | Tight junction                              | 104 | 25 | 1.84 | 7.51E-04 | 6.36E-03 |
| ko04930 | Type II diabetes mellitus                   | 34  | 11 | 2.47 | 8.44E-04 | 6.48E-03 |
| ko04962 | Vasopressin-regulated water reabsorption    | 34  | 11 | 2.47 | 8.44E-04 | 6.48E-03 |
| ko05217 | Basal cell carcinoma                        | 43  | 13 | 2.31 | 8.11E-04 | 6.49E-03 |
| ko04662 | B cell receptor signaling pathway           | 49  | 14 | 2.19 | 1.10E-03 | 8.12E-03 |
| ko05213 | Endometrial cancer                          | 40  | 12 | 2.29 | 1.26E-03 | 9.06E-03 |
| ko05100 | Bacterial invasion of epithelial cells      | 50  | 14 | 2.14 | 1.38E-03 | 9.27E-03 |
| ko00290 | Valine, leucine and isoleucine biosynthesis | 5   | 3  | 4.58 | 1.32E-03 | 9.28E-03 |
| ko04070 | Phosphatidylinositol signaling system       | 65  | 17 | 2.00 | 1.36E-03 | 9.30E-03 |
| ko04010 | MAPK signaling pathway                      | 190 | 39 | 1.57 | 1.51E-03 | 9.88E-03 |
| ko00310 | Lysine degradation                          | 41  | 12 | 2.24 | 1.62E-03 | 1.01E-02 |
| ko04340 | Hedgehog signaling pathway                  | 41  | 12 | 2.24 | 1.62E-03 | 1.01E-02 |
| ko00720 | Carbon fixation pathways in prokaryotes     | 15  | 6  | 3.06 | 1.62E-03 | 1.04E-02 |
| ko05164 | Influenza A                                 | 106 | 24 | 1.73 | 2.26E-03 | 1.31E-02 |
| ko05168 | Herpes simplex infection                    | 106 | 24 | 1.73 | 2.26E-03 | 1.31E-02 |
| ko00230 | Purine metabolism                           | 135 | 29 | 1.65 | 2.37E-03 | 1.34E-02 |
| ko04712 | Circadian rhythm - plant                    | 3   | 2  | 5.09 | 2.25E-03 | 1.35E-02 |
| ko04210 | Apoptosis                                   | 58  | 15 | 1.98 | 2.56E-03 | 1.40E-02 |



|         |                                                                   |     |    |      |          |          |
|---------|-------------------------------------------------------------------|-----|----|------|----------|----------|
| ko04620 | Toll-like receptor signaling pathway                              | 58  | 15 | 1.98 | 2.56E-03 | 1.40E-02 |
| ko04916 | Melanogenesis                                                     | 75  | 18 | 1.84 | 3.12E-03 | 1.63E-02 |
| ko05120 | Epithelial cell signaling in <i>Helicobacter pylori</i> infection | 54  | 14 | 1.98 | 3.20E-03 | 1.65E-02 |
| ko04350 | TGF-beta signaling pathway                                        | 59  | 15 | 1.94 | 3.09E-03 | 1.65E-02 |
| ko04111 | Cell cycle - yeast                                                | 49  | 13 | 2.03 | 3.27E-03 | 1.65E-02 |
| ko04110 | Cell cycle                                                        | 92  | 21 | 1.75 | 3.35E-03 | 1.66E-02 |
| ko03018 | RNA degradation                                                   | 60  | 15 | 1.91 | 3.71E-03 | 1.80E-02 |
| ko04914 | Progesterone-mediated oocyte maturation                           | 60  | 15 | 1.91 | 3.71E-03 | 1.80E-02 |
| ko05130 | Pathogenic <i>Escherichia coli</i> infection                      | 36  | 10 | 2.12 | 5.00E-03 | 2.36E-02 |
| ko04660 | T cell receptor signaling pathway                                 | 73  | 17 | 1.78 | 5.37E-03 | 2.49E-02 |
| ko04960 | Aldosterone-regulated sodium reabsorption                         | 32  | 9  | 2.15 | 6.14E-03 | 2.81E-02 |
| ko04810 | Regulation of actin cytoskeleton                                  | 156 | 31 | 1.52 | 6.32E-03 | 2.85E-02 |
| ko04920 | Adipocytokine signaling pathway                                   | 53  | 13 | 1.87 | 7.03E-03 | 3.12E-02 |
| ko04510 | Focal adhesion                                                    | 158 | 31 | 1.50 | 7.67E-03 | 3.30E-02 |
| ko05110 | <i>Vibrio cholerae</i> infection                                  | 43  | 11 | 1.95 | 7.66E-03 | 3.34E-02 |
| ko04370 | VEGF signaling pathway                                            | 54  | 13 | 1.84 | 8.37E-03 | 3.55E-02 |
| ko05222 | Small cell lung cancer                                            | 66  | 15 | 1.74 | 9.92E-03 | 4.14E-02 |
| ko00561 | Glycerolipid metabolism                                           | 35  | 9  | 1.96 | 1.21E-02 | 4.98E-02 |

**Supplementary Table S8. Number of SNPs in the whole genome.**

| Genotype          | Heterozygous SNP<br>wild camel | Heterozygous SNP<br>domestic camel | Homozygous<br>SNP |
|-------------------|--------------------------------|------------------------------------|-------------------|
| A/G               | 689,145                        | 731,046                            | 599,458           |
| T/C               | 688,645                        | 729,530                            | 600,690           |
| A/T               | 148,035                        | 167,097                            | 125,867           |
| A/C               | 161,266                        | 176,459                            | 136,587           |
| T/G               | 162,547                        | 177,265                            | 136,858           |
| C/G               | 136,782                        | 148,045                            | 111,572           |
| Transition (ts)   | 1,377,790                      | 1,460,576                          | 1,200,148         |
| Transversion (tv) | 608,630                        | 668,866                            | 510,884           |
| Total             | 1,986,420                      | 2,129,442                          | 1,711,032         |
| Ts / tv ratio     | 2.26                           | 2.18                               | 2.35              |

**Supplementary Table S9. Number of small indels in the whole genome.**

| Indel length | Heterozygous indel<br>wild camel | Heterozygous indel<br>domestic camel | Homozygous indel |
|--------------|----------------------------------|--------------------------------------|------------------|
| 1bp          | 93,883                           | 99,411                               | 123,023          |
| 2bp          | 63,950                           | 62,961                               | 42,703           |
| 3bp          | 22,107                           | 24,797                               | 19,718           |
| 4bp          | 23,526                           | 22,937                               | 20,056           |
| 5-10bp       | 23,265                           | 21,316                               | 20,525           |
| >10bp        | 12,374                           | 9,856                                | 10,476           |
| Total        | 239,105                          | 241,278                              | 236,501          |

**Supplementary Table S10. Distribution of SNPs in different genomic regions.**

| Region        | Total length  | Heterozygous SNP<br>wild camel | Heterozygous SNP<br>domestic camel |
|---------------|---------------|--------------------------------|------------------------------------|
| Genome        | 2,010,007,732 | 1,986,420                      | 2,129,442                          |
| Gene interval | 1,539,141,966 | 1,570,921                      | 1,705,319                          |
| Exon          | 27,521,659    | 19,350                         | 16,586                             |
| Intron        | 472,747,974   | 396,149                        | 407,537                            |
| Synonymous    | 9,173,886     | 8,958                          | 7,773                              |
| Nonsynonymous | 18,347,773    | 10,126                         | 8,718                              |

**Supplementary Table S11. Genomic blocks where the heterozygosity of the domestic camel is significantly lower than the wild camel.**

| Scaffold <sup>a</sup> | Start   | End     | Wild.SNP <sup>b</sup> | Dome.SNP <sup>c</sup> | Gene <sup>d</sup>           | Gene annotation                                              |
|-----------------------|---------|---------|-----------------------|-----------------------|-----------------------------|--------------------------------------------------------------|
| scaffold1022          | 621001  | 730001  | 514                   | 2                     | evm.model.scaffold1022.8_1  |                                                              |
| scaffold1045          | 384001  | 406001  | 91                    | 2                     | evm.model.scaffold1045.2_1  | ribosomal protein L3                                         |
| scaffold1095          | 5458001 | 5471001 | 48                    | 1                     | evm.model.scaffold1095.67_1 | chondroitin sulfate N-acetylgalactosaminyltransferase 1-like |
| scaffold1108          | 631001  | 649001  | 62                    | 1                     | evm.model.scaffold1108.5_1  | mKIAA1821 protein                                            |
| scaffold1108          | 3982001 | 4154001 | 777                   | 14                    | evm.model.scaffold1108.73_1 | protein phosphatase 1 regulatory inhibitor subunit 16B-like  |
| scaffold1108          | 3982001 | 4154001 | 777                   | 14                    | evm.model.scaffold1108.74_1 | Protein FAM83D                                               |
| scaffold1108          | 3982001 | 4154001 | 777                   | 14                    | evm.model.scaffold1108.75_1 | probable ATP-dependent RNA helicase DHX35 isoform 2          |
| scaffold1113          | 97001   | 135001  | 143                   | 2                     | evm.model.scaffold1113.3_1  |                                                              |
| scaffold114           | 392001  | 431001  | 175                   | 2                     | evm.model.scaffold114.15_1  | MAD1-like 1 protein                                          |
| scaffold1141          | 1316001 | 1340001 | 80                    | 0                     | evm.model.scaffold1141.14_1 | 60S ribosomal protein L9                                     |
| scaffold122           | 171001  | 191001  | 71                    | 0                     | evm.model.scaffold122.10_1  | olfactory receptor 51I2-like                                 |
| scaffold122           | 171001  | 191001  | 71                    | 0                     | evm.model.scaffold122.11_1  | olfactory receptor 51I2-like                                 |
| scaffold122           | 225001  | 249001  | 91                    | 2                     | evm.model.scaffold122.15_1  | olfactory receptor, family 52, subfamily I, member 2         |
| scaffold122           | 225001  | 249001  | 91                    | 2                     | evm.model.scaffold122.16_1  | Ssu72 RNA polymerase II CTD phosphatase homolog              |
| scaffold1221          | 105001  | 119001  | 66                    | 14                    | evm.model.scaffold1221.7_1  | olfactory receptor, family 2, subfamily G, member 6-like     |
| scaffold123           | 732001  | 756001  | 88                    | 4                     | evm.model.scaffold123.11_1  |                                                              |
| scaffold125           | 622001  | 636001  | 46                    | 1                     | evm.model.scaffold125.19_1  | vasoactive intestinal peptide receptor 2                     |
| scaffold125           | 163001  | 217001  | 246                   | 2                     | evm.model.scaffold125.8_1   |                                                              |
| scaffold1250          | 356001  | 373001  | 53                    | 1                     | evm.model.scaffold1250.9_1  | CTSB protein                                                 |
| scaffold1260          | 9001    | 23001   | 53                    | 8                     | evm.model.scaffold1260.1_1  | cOR8V11 olfactory receptor family 8 subfamily V-like         |
| scaffold1260          | 9001    | 23001   | 53                    | 8                     | evm.model.scaffold1260.2_1  | olfactory receptor 1087-like                                 |

|              |         |         |     |    |                             |                                                                                      |
|--------------|---------|---------|-----|----|-----------------------------|--------------------------------------------------------------------------------------|
| scaffold1309 | 475001  | 532001  | 216 | 5  | evm.model.scaffold1309.7_1  | ribosomal protein L32-like                                                           |
| scaffold1322 | 490001  | 549001  | 218 | 5  | evm.model.scaffold1322.7_1  |                                                                                      |
| scaffold137  | 160001  | 189001  | 139 | 18 | evm.model.scaffold137.1_1   | Rho GDP dissociation inhibitor (GDI) alpha                                           |
| scaffold137  | 212001  | 237001  | 92  | 4  | evm.model.scaffold137.2_1   | intersectin 1                                                                        |
| scaffold138  | 1905001 | 1920001 | 50  | 1  | evm.model.scaffold138.53_1  |                                                                                      |
| scaffold1408 | 1426001 | 1445001 | 67  | 0  | evm.model.scaffold1408.25_1 | hypothetical protein                                                                 |
| scaffold1413 | 2030001 | 2148001 | 509 | 5  | evm.model.scaffold1413.26_1 | secreted frizzled-related protein 2-like                                             |
| scaffold1413 | 2030001 | 2148001 | 509 | 5  | evm.model.scaffold1413.27_1 | ring finger protein 175                                                              |
| scaffold1413 | 2030001 | 2148001 | 509 | 5  | evm.model.scaffold1413.28_1 | Ring finger protein 175 isoform 5                                                    |
| scaffold1413 | 2030001 | 2148001 | 509 | 5  | evm.model.scaffold1413.29_1 | toll-like receptor 2 precursor                                                       |
| scaffold1428 | 4455001 | 4466001 | 49  | 5  | evm.model.scaffold1428.65_1 | hypothetical protein                                                                 |
| scaffold1428 | 4833001 | 4848001 | 45  | 0  | evm.model.scaffold1428.74_1 | eukaryotic translation initiation factor 3 subunit L-like isoform 2                  |
| scaffold1430 | 363001  | 400001  | 195 | 20 | evm.model.scaffold1430.13_1 | hypothetical protein                                                                 |
| scaffold1431 | 577001  | 591001  | 48  | 1  | evm.model.scaffold1431.9_1  | lipopolysaccharide-induced TNF factor                                                |
| scaffold1437 | 627001  | 645001  | 75  | 5  | evm.model.scaffold1437.12_1 |                                                                                      |
| scaffold1437 | 747001  | 794001  | 189 | 8  | evm.model.scaffold1437.17_1 |                                                                                      |
| scaffold146  | 1130001 | 1143001 | 44  | 1  | evm.model.scaffold146.19_1  | coiled-coil domain-containing protein 3-like                                         |
| scaffold1481 | 267001  | 292001  | 94  | 5  | evm.model.scaffold1481.23_1 | olfactory receptor, family 11, subfamily H, member 1 isoform 2                       |
| scaffold1481 | 267001  | 292001  | 94  | 5  | evm.model.scaffold1481.24_1 | olfactory receptor 11H6-like                                                         |
| scaffold1506 | 987001  | 1008001 | 81  | 2  | evm.model.scaffold1506.12_1 | emerin-like                                                                          |
| scaffold1533 | 2300001 | 2323001 | 102 | 5  | evm.model.scaffold1533.25_1 | TRIM5/CypA fusion protein                                                            |
| scaffold1533 | 1009001 | 1022001 | 41  | 1  | evm.model.scaffold1533.8_1  | 5-hydroxytryptamine receptor 5B-like                                                 |
| scaffold1533 | 1009001 | 1022001 | 41  | 1  | evm.model.scaffold1533.9_1  | 5-hydroxytryptamine receptor 5B-like                                                 |
| scaffold1561 | 386001  | 422001  | 127 | 7  | evm.model.scaffold1561.9_1  | Acyl-CoA-binding protein (ACBP) (Diazepam binding inhibitor) (DBI) (Endozepine) (EP) |
| scaffold1577 | 359001  | 376001  | 55  | 4  | evm.model.scaffold1577.5_1  | C-type lectin domain family 4 member K (Langerin)                                    |

|              |         |         |     |    |                             |                                                                                                                             |
|--------------|---------|---------|-----|----|-----------------------------|-----------------------------------------------------------------------------------------------------------------------------|
| scaffold1578 | 62001   | 89001   | 100 | 1  | evm.model.scaffold1578.3_1  | (CD207 antigen)<br>arylsulfatase E                                                                                          |
| scaffold161  | 289001  | 364001  | 291 | 7  | evm.model.scaffold161.5_1   | platelet endothelial aggregation receptor 1-like                                                                            |
| scaffold161  | 289001  | 364001  | 291 | 7  | evm.model.scaffold161.6_1   | platelet endothelial aggregation receptor 1                                                                                 |
| scaffold1679 | 316001  | 344001  | 95  | 3  | evm.model.scaffold1679.5_1  |                                                                                                                             |
| scaffold1683 | 4510001 | 4524001 | 62  | 7  | evm.model.scaffold1683.42_1 | Epithelial membrane protein-1 (EMP-1)<br>(Tumor-associated membrane protein)                                                |
| scaffold1683 | 999001  | 1023001 | 91  | 1  | evm.model.scaffold1683.6_1  | capping protein alpha 3                                                                                                     |
| scaffold1683 | 6077001 | 6103001 | 113 | 0  | evm.model.scaffold1683.71_1 | natural killer cell receptor Ly49P2-like                                                                                    |
| scaffold1692 | 62001   | 86001   | 104 | 1  | evm.model.scaffold1692.1_1  | hypothetical protein                                                                                                        |
| scaffold1749 | 1109001 | 1123001 | 42  | 0  | evm.model.scaffold1749.11_1 | hypothetical protein                                                                                                        |
| scaffold175  | 1732001 | 1746001 | 35  | 0  | evm.model.scaffold175.37_1  | somatostatin receptor type 3                                                                                                |
| scaffold1753 | 1       | 21001   | 104 | 0  | evm.model.scaffold1753.1_1  | syntrophin 5                                                                                                                |
| scaffold176  | 79001   | 91001   | 37  | 0  | evm.model.scaffold176.4_1   | Alpha-sarcoglycan precursor (Alpha-SG) (Adhalin)<br>(50 kDa dystrophin-associated glycoprotein) (50DAG)<br>(Dystroglycan-2) |
| scaffold176  | 79001   | 91001   | 37  | 0  | evm.model.scaffold176.5_1   | spermatid-specific linker histone H1-like protein                                                                           |
| scaffold1891 | 608001  | 631001  | 79  | 0  | evm.model.scaffold1891.3_1  |                                                                                                                             |
| scaffold200  | 327001  | 341001  | 64  | 8  | evm.model.scaffold200.5_1   | tripartite motif-containing protein 29-like                                                                                 |
| scaffold216  | 1336001 | 1358001 | 84  | 5  | evm.model.scaffold216.40_1  |                                                                                                                             |
| scaffold216  | 1555001 | 1582001 | 98  | 1  | evm.model.scaffold216.50_1  | fibroblast growth factor                                                                                                    |
| scaffold218  | 266001  | 376001  | 637 | 23 | evm.model.scaffold218.11_1  | GDP-mannose 4,6 dehydratase-like                                                                                            |
| scaffold218  | 584001  | 620001  | 148 | 10 | evm.model.scaffold218.18_1  | zonadhesin-like                                                                                                             |
| scaffold218  | 8001    | 41001   | 189 | 18 | evm.model.scaffold218.2_1   |                                                                                                                             |
| scaffold218  | 854001  | 888001  | 165 | 11 | evm.model.scaffold218.28_1  | Serpin B9 (Cytoplasmic antiproteinase 3) (CAP-3)<br>(CAP3) (Proteinase inhibitor 9)                                         |
| scaffold218  | 8001    | 41001   | 189 | 18 | evm.model.scaffold218.3_1   |                                                                                                                             |
| scaffold218  | 162001  | 258001  | 496 | 31 | evm.model.scaffold218.6_1   |                                                                                                                             |

|               |         |         |     |    |                              |                                                                                                                                                                           |
|---------------|---------|---------|-----|----|------------------------------|---------------------------------------------------------------------------------------------------------------------------------------------------------------------------|
| scaffold218   | 162001  | 258001  | 496 | 31 | evm.model.scaffold218.7_1    | GDP-mannose 4,6 dehydratase                                                                                                                                               |
| scaffold218   | 266001  | 376001  | 637 | 23 | evm.model.scaffold218.9_1    |                                                                                                                                                                           |
| scaffold2195  | 95001   | 115001  | 78  | 1  | evm.model.scaffold2195.3_1   | potassium inwardly-rectifying channel J15 isoform 3                                                                                                                       |
| scaffold233   | 808001  | 843001  | 165 | 5  | evm.model.scaffold233.30_1   |                                                                                                                                                                           |
| scaffold233   | 808001  | 843001  | 165 | 5  | evm.model.scaffold233.31_1   | rearranged T-cell receptor delta-chain/<br>Vdelta2-Ddeltas-Jdelta1 - pig (fragment)<br>dbj BAA08523.1  rearranged T-cell receptor<br>delta-chain/ Vdelta2-Ddeltas-Jdelta1 |
| scaffold234   | 721001  | 751001  | 148 | 2  | evm.model.scaffold234.21_1   | mas-related G-protein coupled receptor MRG-like                                                                                                                           |
| scaffold2519  | 5585001 | 5618001 | 168 | 7  | evm.model.scaffold2519.35_1  | hypothetical protein                                                                                                                                                      |
| scaffold253   | 528001  | 546001  | 63  | 5  | evm.model.scaffold253.12_1   | D-amino-acid oxidase                                                                                                                                                      |
| scaffold25522 | 645001  | 662001  | 69  | 8  | evm.model.scaffold25522.13_1 | hypothetical protein                                                                                                                                                      |
| scaffold265   | 550001  | 575001  | 83  | 0  | evm.model.scaffold265.12_1   |                                                                                                                                                                           |
| scaffold2781  | 11001   | 31001   | 72  | 1  | evm.model.scaffold2781.2_1   | vomeronasal 1 receptor bosTauV1R403                                                                                                                                       |
| scaffold293   | 2196001 | 2219001 | 95  | 3  | evm.model.scaffold293.28_1   |                                                                                                                                                                           |
| scaffold303   | 1157001 | 1213001 | 241 | 9  | evm.model.scaffold303.7_1    | transmembrane protease serine 5-like                                                                                                                                      |
| scaffold306   | 1951001 | 1967001 | 51  | 0  | evm.model.scaffold306.36_1   | small proline-rich protein 1B                                                                                                                                             |
| scaffold309   | 756001  | 782001  | 98  | 0  | evm.model.scaffold309.21_1   | transcription elongation regulator 1-like protein-like                                                                                                                    |
| scaffold312   | 485001  | 535001  | 240 | 15 | evm.model.scaffold312.5_1    | prominin-1-like                                                                                                                                                           |
| scaffold322   | 518001  | 533001  | 43  | 0  | evm.model.scaffold322.15_1   | olfactory receptor 281-like                                                                                                                                               |
| scaffold331   | 1379001 | 1407001 | 120 | 3  | evm.model.scaffold331.27_1   |                                                                                                                                                                           |
| scaffold335   | 940001  | 952001  | 39  | 1  | evm.model.scaffold335.13_1   |                                                                                                                                                                           |
| scaffold339   | 2427001 | 2438001 | 48  | 2  | evm.model.scaffold339.29_1   | olfactory receptor MOR276-1                                                                                                                                               |
| scaffold339   | 2918001 | 2936001 | 61  | 1  | evm.model.scaffold339.50_1   | olfactory receptor Olr12                                                                                                                                                  |
| scaffold339   | 2918001 | 2936001 | 61  | 1  | evm.model.scaffold339.51_1   | olfactory receptor, family 6, subfamily F, member<br>1-like                                                                                                               |
| scaffold345   | 1058001 | 1098001 | 140 | 1  | evm.model.scaffold345.35_1   |                                                                                                                                                                           |
| scaffold347   | 448001  | 464001  | 73  | 9  | evm.model.scaffold347.11_1   | fibromodulin precursor                                                                                                                                                    |



|               |         |         |     |    |                             |                                                                                                                                   |
|---------------|---------|---------|-----|----|-----------------------------|-----------------------------------------------------------------------------------------------------------------------------------|
| scaffold350   | 357001  | 393001  | 168 | 12 | evm.model.scaffold350.12_1  |                                                                                                                                   |
| scaffold350   | 54001   | 109001  | 193 | 0  | evm.model.scaffold350.3_1   |                                                                                                                                   |
| scaffold350   | 3310001 | 3375001 | 283 | 3  | evm.model.scaffold350.69_1  | ubiquitin specific peptidase 17                                                                                                   |
| scaffold350   | 3310001 | 3375001 | 283 | 3  | evm.model.scaffold350.70_1  | Protein FAM90A1                                                                                                                   |
| scaffold350   | 3409001 | 3504001 | 504 | 9  | evm.model.scaffold350.71_1  | neuronal membrane glycoprotein M6-a-like                                                                                          |
| scaffold351   | 514001  | 563001  | 254 | 22 | evm.model.scaffold351.12_1  | olfactory receptor 10J1-like                                                                                                      |
| scaffold351   | 514001  | 563001  | 254 | 22 | evm.model.scaffold351.13_1  | olfactory receptor, family 10, subfamily J, member 1, partial                                                                     |
| scaffold351   | 514001  | 563001  | 254 | 22 | evm.model.scaffold351.14_1  | olfactory receptor 10J4                                                                                                           |
| scaffold351   | 566001  | 586001  | 74  | 3  | evm.model.scaffold351.15_1  | olfactory receptor 10J1-like                                                                                                      |
| scaffold363   | 590001  | 608001  | 60  | 1  | evm.model.scaffold363.12_1  | Calsyntenin-1 precursor (Alcadein-alpha) (Alc-alpha) (Alzheimer-related cadherin-like protein) (Non-classical cadherin XB31alpha) |
| scaffold365   | 4490001 | 4533001 | 179 | 0  | evm.model.scaffold365.92_1  | olfactory receptor 859 (predicted)                                                                                                |
| scaffold365   | 4490001 | 4533001 | 179 | 0  | evm.model.scaffold365.93_1  | olfactory receptor MOR258-6-like                                                                                                  |
| scaffold365   | 4490001 | 4533001 | 179 | 0  | evm.model.scaffold365.94_1  | olfactory receptor 2A12-like                                                                                                      |
| scaffold372   | 814001  | 843001  | 112 | 2  | evm.model.scaffold372.18_1  |                                                                                                                                   |
| scaffold372   | 814001  | 843001  | 112 | 2  | evm.model.scaffold372.19_1  |                                                                                                                                   |
| scaffold38411 | 309001  | 350001  | 123 | 1  | evm.model.scaffold38411.5_1 | protein phosphatase 1L-like                                                                                                       |
| scaffold38411 | 656001  | 667001  | 36  | 0  | evm.model.scaffold38411.7_1 | otolin-1-like                                                                                                                     |
| scaffold385   | 418001  | 437001  | 59  | 0  | evm.model.scaffold385.11_1  |                                                                                                                                   |
| scaffold385   | 745001  | 772001  | 100 | 1  | evm.model.scaffold385.27_1  | olfactory receptor 523                                                                                                            |
| scaffold388   | 408001  | 450001  | 181 | 1  | evm.model.scaffold388.2_1   | protein arginine methyltransferase 8                                                                                              |
| scaffold390   | 1191001 | 1208001 | 61  | 3  | evm.model.scaffold390.39_1  |                                                                                                                                   |
| scaffold400   | 1242001 | 1265001 | 83  | 3  | evm.model.scaffold400.22_1  | olfactory receptor 10A5-like                                                                                                      |
| scaffold400   | 1242001 | 1265001 | 83  | 3  | evm.model.scaffold400.23_1  | olfactory receptor 10A5 (HP3) (Olfactory receptor-like protein JCG6)                                                              |
| scaffold41    | 541001  | 572001  | 110 | 0  | evm.model.scaffold41.11_1   | p2X purinoceptor 1-like                                                                                                           |

|               |         |         |     |    |                              |                                                                                                                                                                                                                          |
|---------------|---------|---------|-----|----|------------------------------|--------------------------------------------------------------------------------------------------------------------------------------------------------------------------------------------------------------------------|
| scaffold41513 | 48001   | 64001   | 60  | 2  | evm.model.scaffold41513.1_1  | Hypothetical BAF-like protein C20orf179                                                                                                                                                                                  |
| scaffold418   | 590001  | 610001  | 75  | 1  | evm.model.scaffold418.27_1   | olfactory receptor 7E24                                                                                                                                                                                                  |
| scaffold418   | 653001  | 690001  | 131 | 2  | evm.model.scaffold418.30_1   | olfactory receptor 7A10-like                                                                                                                                                                                             |
| scaffold444   | 1043001 | 1059001 | 58  | 1  | evm.model.scaffold444.7_1    | 60S ribosomal protein L13                                                                                                                                                                                                |
| scaffold449   | 97001   | 114001  | 53  | 0  | evm.model.scaffold449.10_1   | matrix metalloproteinase-19-like                                                                                                                                                                                         |
| scaffold449   | 97001   | 114001  | 53  | 0  | evm.model.scaffold449.9_1    | transmembrane protein 198-like                                                                                                                                                                                           |
| scaffold465   | 85001   | 96001   | 36  | 0  | evm.model.scaffold465.1_1    | transcription cofactor vestigial-like protein 4                                                                                                                                                                          |
| scaffold465   | 1421001 | 1440001 | 69  | 0  | evm.model.scaffold465.24_1   | prothyloliberin-like                                                                                                                                                                                                     |
| scaffold466   | 577001  | 607001  | 105 | 0  | evm.model.scaffold466.13_1   | small subunit ribosomal protein S2e                                                                                                                                                                                      |
| scaffold475   | 557001  | 600001  | 155 | 1  | evm.model.scaffold475.3_1    | laforin isoform a                                                                                                                                                                                                        |
| scaffold486   | 451001  | 462001  | 36  | 0  | evm.model.scaffold486.13_1   |                                                                                                                                                                                                                          |
| scaffold493   | 1267001 | 1279001 | 37  | 0  | evm.model.scaffold493.4_1    | 40S ribosomal protein SA-like                                                                                                                                                                                            |
| scaffold497   | 315001  | 362001  | 164 | 1  | evm.model.scaffold497.4_1    | Sodium channel protein type 7 subunit alpha (Sodium channel protein type VII subunit alpha) (Putative voltage-gated sodium channel subunit alpha Nax) (Sodium channel protein cardiac and skeletal muscle subunit alpha) |
| scaffold524   | 143001  | 164001  | 71  | 0  | evm.model.scaffold524.4_1    | coproporphyrinogen-III oxidase-like                                                                                                                                                                                      |
| scaffold539   | 390001  | 428001  | 142 | 3  | evm.model.scaffold539.1_1    | RING finger protein 26-like                                                                                                                                                                                              |
| scaffold539   | 390001  | 428001  | 142 | 3  | evm.model.scaffold539.2_1    | RING finger protein 26-like                                                                                                                                                                                              |
| scaffold539   | 390001  | 428001  | 142 | 3  | evm.model.scaffold539.3_1    | Rnf26 protein                                                                                                                                                                                                            |
| scaffold547   | 248001  | 283001  | 136 | 10 | evm.model.scaffold547.7_1    | hypothetical protein                                                                                                                                                                                                     |
| scaffold548   | 759001  | 801001  | 148 | 2  | evm.model.scaffold548.14_1   |                                                                                                                                                                                                                          |
| scaffold55    | 5001    | 24001   | 113 | 18 | evm.model.scaffold55.1_1     | Olfactory receptor 1F12 (Hs6M1-35P)                                                                                                                                                                                      |
| scaffold565   | 1598001 | 1611001 | 41  | 0  | evm.model.scaffold565.3_1    | hypothetical protein                                                                                                                                                                                                     |
| scaffold573   | 17001   | 50001   | 117 | 8  | evm.model.scaffold573.2_1    | cystatin-C-like                                                                                                                                                                                                          |
| scaffold60782 | 7229001 | 7250001 | 73  | 0  | evm.model.scaffold60782.88_1 | G-protein coupled receptor 183-like                                                                                                                                                                                      |
| scaffold637   | 449001  | 467001  | 63  | 1  | evm.model.scaffold637.3_1    |                                                                                                                                                                                                                          |

|             |         |         |     |    |                            |                                                                                                                                                                                                                        |
|-------------|---------|---------|-----|----|----------------------------|------------------------------------------------------------------------------------------------------------------------------------------------------------------------------------------------------------------------|
| scaffold639 | 179001  | 195001  | 60  | 1  | evm.model.scaffold639.5_1  | gastricsin-like                                                                                                                                                                                                        |
| scaffold650 | 21001   | 51001   | 118 | 4  | evm.model.scaffold650.3_1  | hypothetical protein                                                                                                                                                                                                   |
| scaffold650 | 306001  | 325001  | 59  | 0  | evm.model.scaffold650.30_1 | olfactory receptor Olr78                                                                                                                                                                                               |
| scaffold650 | 306001  | 325001  | 59  | 0  | evm.model.scaffold650.31_1 | Matrix metalloproteinase-26 precursor (MMP-26) (Matrilysin-2) (Endometase)                                                                                                                                             |
| scaffold650 | 395001  | 414001  | 68  | 2  | evm.model.scaffold650.37_1 | olfactory receptor, family 51, subfamily T, member 1                                                                                                                                                                   |
| scaffold650 | 395001  | 414001  | 68  | 2  | evm.model.scaffold650.38_1 | putative olfactory receptor 51H1-like                                                                                                                                                                                  |
| scaffold650 | 395001  | 414001  | 68  | 2  | evm.model.scaffold650.39_1 | olfactory receptor 555                                                                                                                                                                                                 |
| scaffold650 | 21001   | 51001   | 118 | 4  | evm.model.scaffold650.4_1  | olfactory receptor 614                                                                                                                                                                                                 |
| scaffold650 | 21001   | 51001   | 118 | 4  | evm.model.scaffold650.5_1  | olfactory receptor 611                                                                                                                                                                                                 |
| scaffold672 | 473001  | 502001  | 115 | 0  | evm.model.scaffold672.8_1  | DCN1-like protein 3                                                                                                                                                                                                    |
| scaffold681 | 2188001 | 2201001 | 37  | 0  | evm.model.scaffold681.19_1 | sorting nexin-20                                                                                                                                                                                                       |
| scaffold69  | 342001  | 365001  | 73  | 0  | evm.model.scaffold69.15_1  |                                                                                                                                                                                                                        |
| scaffold692 | 1506001 | 1541001 | 143 | 8  | evm.model.scaffold692.21_1 | Uncharacterized protein C1orf131                                                                                                                                                                                       |
| scaffold698 | 546001  | 561001  | 63  | 4  | evm.model.scaffold698.6_1  | procollagen-lysine, 2-oxoglutarate 5-dioxygenase 3                                                                                                                                                                     |
| scaffold698 | 546001  | 561001  | 63  | 4  | evm.model.scaffold698.7_1  | procollagen-lysine, 2-oxoglutarate 5-dioxygenase 3 precursor isoform 1                                                                                                                                                 |
| scaffold698 | 546001  | 561001  | 63  | 4  | evm.model.scaffold698.8_1  | procollagen-lysine,2-oxoglutarate 5-dioxygenase 3-like                                                                                                                                                                 |
| scaffold699 | 2220001 | 2352001 | 518 | 2  | evm.model.scaffold699.23_1 | haloacid dehalogenase-like hydrolase domain-containing protein 2                                                                                                                                                       |
| scaffold70  | 5001    | 16001   | 69  | 16 | evm.model.scaffold70.1_1   | Leukocyte immunoglobulin-like receptor subfamily B member 3 precursor (Leukocyte immunoglobulin-like receptor 3) (LIR-3) (Immunoglobulin-like transcript 5) (ILT-5) (Monocyte inhibitory receptor HL9) (CD85a antigen) |
| scaffold70  | 150001  | 162001  | 45  | 4  | evm.model.scaffold70.11_1  | osteoclast-associated receptor-like                                                                                                                                                                                    |
| scaffold705 | 125001  | 139001  | 44  | 0  | evm.model.scaffold705.3_1  | high mobility group protein B4-like                                                                                                                                                                                    |

|               |         |         |     |    |                              |                                                                       |
|---------------|---------|---------|-----|----|------------------------------|-----------------------------------------------------------------------|
| scaffold719   | 976001  | 987001  | 47  | 4  | evm.model.scaffold719.10_1   | claudin-20-like                                                       |
| scaffold726   | 4093001 | 4121001 | 111 | 2  | evm.model.scaffold726.62_1   | bradykinin B1 receptor                                                |
| scaffold726   | 4093001 | 4121001 | 111 | 2  | evm.model.scaffold726.63_1   | bradykinin receptor B1                                                |
| scaffold728   | 106001  | 152001  | 176 | 1  | evm.model.scaffold728.2_1    | calponin-2                                                            |
| scaffold743   | 781001  | 806001  | 97  | 0  | evm.model.scaffold743.33_1   | free fatty acid receptor 2-like                                       |
| scaffold761   | 692001  | 714001  | 83  | 1  | evm.model.scaffold761.14_1   | 60S ribosomal protein L6-like                                         |
| scaffold782   | 39001   | 57001   | 56  | 0  | evm.model.scaffold782.2_1    | hypothetical protein                                                  |
| scaffold803   | 3878001 | 3902001 | 83  | 2  | evm.model.scaffold803.38_1   | T-cell receptor gamma chain                                           |
| scaffold803   | 3905001 | 3920001 | 55  | 0  | evm.model.scaffold803.40_1   | TCR gamma V9-1-like                                                   |
| scaffold804   | 2888001 | 2908001 | 81  | 2  | evm.model.scaffold804.40_1   | T cell receptor beta                                                  |
| scaffold804   | 2888001 | 2908001 | 81  | 2  | evm.model.scaffold804.41_1   | hypothetical protein                                                  |
| scaffold804   | 2888001 | 2908001 | 81  | 2  | evm.model.scaffold804.42_1   | V_segment translation product                                         |
| scaffold804   | 2888001 | 2908001 | 81  | 2  | evm.model.scaffold804.43_1   | putative T cell receptor beta chain variable region                   |
| scaffold823   | 231001  | 263001  | 110 | 4  | evm.model.scaffold823.8_1    | probable palmitoyltransferase ZDHHC19-like                            |
| scaffold823   | 231001  | 263001  | 110 | 4  | evm.model.scaffold823.9_1    | zinc finger, DHHC-type containing 19                                  |
| scaffold824   | 194001  | 212001  | 81  | 6  | evm.model.scaffold824.1_1    |                                                                       |
| scaffold829   | 102001  | 113001  | 35  | 0  | evm.model.scaffold829.12_1   | olfactory receptor 652                                                |
| scaffold841   | 1343001 | 1355001 | 36  | 0  | evm.model.scaffold841.18_1   | Seizure related 6 homolog (mouse)-like                                |
| scaffold849   | 2645001 | 2671001 | 98  | 2  | evm.model.scaffold849.68_1   |                                                                       |
| scaffold851   | 41001   | 92001   | 182 | 1  | evm.model.scaffold851.2_1    |                                                                       |
| scaffold857   | 32001   | 44001   | 82  | 20 | evm.model.scaffold857.2_1    | olfactory receptor Olr1014                                            |
| scaffold86    | 155001  | 171001  | 60  | 5  | evm.model.scaffold86.5_1     | histone H2A type 3                                                    |
| scaffold86314 | 149001  | 192001  | 210 | 11 | evm.model.scaffold86314.5_1  | Fc receptor-like protein 1-like                                       |
| scaffold875   | 3272001 | 3310001 | 115 | 0  | evm.model.scaffold875.44_1   | cytochrome P450, family 24, subfamily A, polypeptide 1-like isoform 2 |
| scaffold880   | 2620001 | 2662001 | 215 | 19 | evm.model.scaffold880.66_1   |                                                                       |
| scaffold88230 | 160001  | 184001  | 99  | 4  | evm.model.scaffold88230.13_1 | olfactory receptor, family 51, subfamily V, member 1 (predicted)      |

|               |         |         |     |   |                              |                                                                  |
|---------------|---------|---------|-----|---|------------------------------|------------------------------------------------------------------|
| scaffold88230 | 190001  | 206001  | 62  | 4 | evm.model.scaffold88230.15_1 | olfactory receptor, family 52, subfamily A, member 1 (predicted) |
| scaffold88230 | 190001  | 206001  | 62  | 4 | evm.model.scaffold88230.16_1 | olfactory receptor, family 52, subfamily A, member 5             |
| scaffold896   | 88001   | 127001  | 148 | 0 | evm.model.scaffold896.4_1    |                                                                  |
| scaffold921   | 534001  | 552001  | 60  | 0 | evm.model.scaffold921.9_1    | glyceraldehyde-3-phosphate dehydrogenase                         |
| scaffold931   | 7845001 | 7863001 | 61  | 2 | evm.model.scaffold931.92_1   | Adaptor-related protein complex AP-1, sigma 3                    |
| scaffold96841 | 24001   | 39001   | 64  | 3 | evm.model.scaffold96841.3_1  | olfactory receptor 10A7-like                                     |
| scaffold977   | 1087001 | 1131001 | 191 | 6 | evm.model.scaffold977.11_1   | tetratricopeptide repeat domain 15                               |
| scaffold98824 | 480001  | 499001  | 83  | 5 | evm.model.scaffold98824.11_1 | 60S ribosomal protein L28-like                                   |
| scaffold98824 | 480001  | 499001  | 83  | 5 | evm.model.scaffold98824.12_1 | Serine protease HTRA1 precursor (L56) (Serine protease 11)       |

<sup>a</sup>Serial number of scaffolds.

<sup>b</sup>Number of SNPs in the wild camel.

<sup>c</sup>Number of SNPs in the domestic camel.

<sup>d</sup>Genes contained in the block, represented by serial number.

**Supplementary Table S12. GO enrichment for the genes in Supplementary Table S11.**

| GO ID      | Ontology           | Term                                         | Selected genes | Total genes | Log odds ratio | FDR      |
|------------|--------------------|----------------------------------------------|----------------|-------------|----------------|----------|
| GO:0009987 | biological_process | cellular process                             | 73/180         | 5025/19629  | 0.66           | 8.66E-04 |
| GO:0007154 | biological_process | cell communication                           | 49/180         | 1787/19629  | 1.58           | 3.15E-10 |
| GO:0007165 | biological_process | signal transduction                          | 48/180         | 1704/19629  | 1.62           | 2.64E-10 |
| GO:0007166 | biological_process | cell surface receptor signaling pathway      | 47/180         | 1235/19629  | 2.05           | 1.86E-14 |
| GO:0007186 | biological_process | G-protein coupled receptor signaling pathway | 47/180         | 1162/19629  | 2.14           | 3.82E-15 |
| GO:0023052 | biological_process | signaling                                    | 48/180         | 1721/19629  | 1.60           | 3.15E-10 |
| GO:0050789 | biological_process | regulation of biological process             | 49/180         | 2057/19629  | 1.38           | 3.14E-08 |
| GO:0050794 | biological_process | regulation of cellular process               | 48/180         | 2028/19629  | 1.37           | 6.01E-08 |
| GO:0050896 | biological_process | response to stimulus                         | 48/180         | 1963/19629  | 1.41           | 2.23E-08 |
| GO:0051716 | biological_process | cellular response to stimulus                | 48/180         | 1773/19629  | 1.56           | 8.32E-10 |
| GO:0065007 | biological_process | biological regulation                        | 49/180         | 2153/19629  | 1.31           | 1.34E-07 |
| GO:0016020 | cellular_component | membrane                                     | 56/180         | 3213/19629  | 0.93           | 7.90E-05 |
| GO:0016021 | cellular_component | integral to membrane                         | 48/180         | 1852/19629  | 1.50           | 3.49E-09 |
| GO:0031224 | cellular_component | intrinsic to membrane                        | 48/180         | 1854/19629  | 1.50           | 3.49E-09 |
| GO:0044425 | cellular_component | membrane part                                | 50/180         | 2013/19629  | 1.44           | 4.88E-09 |
| GO:0004871 | molecular_function | signal transducer activity                   | 44/180         | 1337/19629  | 1.84           | 1.69E-11 |
| GO:0004872 | molecular_function | receptor activity                            | 45/180         | 1314/19629  | 1.90           | 2.57E-12 |
| GO:0004888 | molecular_function | transmembrane signaling receptor activity    | 44/180         | 1109/19629  | 2.11           | 4.03E-14 |
| GO:0004984 | molecular_function | olfactory receptor activity                  | 38/180         | 742/19629   | 2.48           | 3.82E-15 |
| GO:0038023 | molecular_function | signaling receptor activity                  | 44/180         | 1193/19629  | 2.01           | 4.66E-13 |
| GO:0060089 | molecular_function | molecular transducer activity                | 44/180         | 1337/19629  | 1.84           | 1.69E-11 |

**Supplementary Table S13. Copy number of P450 genes in camel and other mammals.**

| Family | Subfamily | Cattle | Horse | Human | Camel |
|--------|-----------|--------|-------|-------|-------|
| CYP1   |           | 4      | 3     | 3     | 3     |
|        | CYP1A     | 3      | 2     | 2     | 2     |
|        | CYP1B     | 1      | 1     | 1     | 1     |
|        | CYP1C     | 0      | 0     | 0     | 0     |
| CYP2   |           | 23     | 31    | 20    | 27    |
|        | CYP2A     | 1      | 3     | 4     | 1     |
|        | CYP2B     | 1      | 3     | 2     | 1     |
|        | CYP2C     | 8      | 9     | 4     | 4     |
|        | CYP2D     | 2      | 7     | 2     | 2     |
|        | CYP2E     | 1      | 1     | 1     | 2     |
|        | CYP2F     | 1      | 1     | 1     | 2     |
|        | CYP2G     | 1      | 1     | 1     | 0     |
|        | CYP2J     | 4      | 1     | 1     | 11    |
|        | CYP2K     | 0      | 0     | 0     | 0     |
|        | CYP2R     | 1      | 1     | 1     | 1     |
|        | CYP2S     | 1      | 1     | 1     | 1     |
|        | CYP2T     | 0      | 1     | 0     | 0     |
|        | CYP2U     | 1      | 1     | 1     | 1     |
|        | CYP2W     | 1      | 1     | 1     | 1     |
| CYP3   |           | 3      | 7     | 5     | 6     |
|        | CYP3A     | 3      | 7     | 5     | 6     |
| CYP4   |           | 13     | 15    | 12    | 7     |
|        | CYP4A     | 3      | 3     | 2     | 1     |
|        | CYP4B     | 1      | 3     | 1     | 2     |
|        | CYP4F     | 7      | 7     | 6     | 2     |
|        | CYP4V     | 1      | 1     | 1     | 1     |
|        | CYP4X     | 1      | 1     | 1     | 1     |
|        | CYP4Z     | 0      | 0     | 1     | 0     |
| CYP5   |           | 1      | 1     | 1     | 0     |
|        | CYP5A     | 1      | 1     | 0     | 0     |
| CYP7   |           | 1      | 2     | 1     | 2     |
|        | CYP7A     | 0      | 1     | 0     | 1     |
|        | CYP7B     | 1      | 1     | 1     | 1     |
| CYP8   |           | 2      | 2     | 2     | 2     |
|        | CYP8A     | 0      | 1     | 0     | 0     |
|        | CYP8B     | 0      | 1     | 0     | 2     |
| CYP11  |           | 3      | 3     | 3     | 2     |
|        | CYP11A    | 1      | 1     | 1     | 1     |
|        | CYP11B    | 2      | 2     | 2     | 1     |
| CYP17  |           | 1      | 1     | 1     | 1     |

|       |        |   |   |   |   |
|-------|--------|---|---|---|---|
|       | CYP17A | 1 | 1 | 1 | 1 |
| CYP19 |        | 1 | 1 | 1 | 1 |
|       | CYP19A | 1 | 1 | 1 | 1 |
| CYP20 |        | 0 | 1 | 0 | 1 |
|       | CYP20A | 0 | 1 | 0 | 1 |
| CYP21 |        | 2 | 1 | 6 | 1 |
|       | CYP21A | 2 | 1 | 6 | 1 |
| CYP24 |        | 0 | 1 | 1 | 1 |
|       | CYP24A | 0 | 1 | 1 | 1 |
| CYP26 |        | 3 | 3 | 3 | 3 |
|       | CYP26A | 1 | 1 | 1 | 1 |
|       | CYP26B | 1 | 1 | 1 | 1 |
|       | CYP26C | 1 | 1 | 1 | 1 |
| CYP27 |        | 3 | 3 | 3 | 3 |
|       | CYP27A | 1 | 1 | 1 | 1 |
|       | CYP27B | 1 | 1 | 1 | 1 |
|       | CYP27C | 1 | 1 | 1 | 1 |
| CYP39 |        | 0 | 1 | 0 | 1 |
|       | CYP39A | 0 | 1 | 0 | 1 |
| CYP46 |        | 1 | 1 | 1 | 1 |
|       | CYP46A | 1 | 1 | 1 | 1 |
| CYP51 |        | 1 | 1 | 1 | 1 |
|       | CYP51A | 1 | 1 | 1 | 1 |



**Supplementary Table S14. Scaffolds involved in generation of antibodies.**

| Serial number of scaffold | Type and number of antibody gene |
|---------------------------|----------------------------------|
| 102281                    | C(1)                             |
| 118423                    | C(1)                             |
| 189423                    | C(1)                             |
| 30932                     | C(1)                             |
| 35456                     | C(1)                             |
| 92866                     | C(1)                             |
| 13147                     | V(1)                             |
| 1470                      | V(3)                             |
| 15220                     | V(4)                             |
| 1527                      | V(3)                             |
| 2392                      | V(1)                             |
| 37069                     | V(1)                             |
| 44205                     | V(1)                             |
| 49067                     | V(1)                             |
| 355.1                     | V(2), D(7), J(6), C(2)           |
| 355.2                     | C(2)                             |

**Supplementary Table S15. VH/CH gene annotation in detail.**

| Serial number of scaffold | Start  | End    | Gene type    |
|---------------------------|--------|--------|--------------|
| 2392                      | 6430   | 5837   | VHH3         |
| 355.1                     | 17759  | 18350  | VH3          |
| 355.1                     | 13993  | 14617  | VH3          |
| 37069                     | 171    | 777    | VHH3         |
| 1527                      | 36077  | 36663  | VH3          |
| 1527                      | 3534   | 4120   | VH3          |
| 1527                      | 9119   | 9705   | VH3          |
| 1470                      | 16651  | 17234  | VHH3         |
| 1470                      | 18248  | 18729  | VH3          |
| 1470                      | 7777   | 7944   | VH4          |
| 13147                     | 1061   | 705    | VH4          |
| 15220                     | 2111   | 2404   | VH4          |
| 15220                     | 7693   | 7955   | VH4          |
| 15220                     | 17036  | 17291  | VH4          |
| 15220                     | 18404  | 18692  | VH4          |
| 44205                     | 1351   | 542    | VHH          |
| 49067                     | 8181   | 8466   | VHH          |
| 102281                    | 1978   | 292    | C $\gamma$   |
| 118423                    | 496    | 68     | C $\gamma$   |
| 18984                     | 465    | 1      | C $\gamma$   |
| 30932                     | 597    | 4      | C $\gamma$   |
| 35456                     | 2430   | 1625   | C $\gamma$   |
| 92866                     | 24     | 523    | C $\gamma$   |
| 355.1                     | 70147  | 75177  | C $\mu$      |
| 355.1                     | 79388  | 82732  | C $\delta$   |
| 355.2                     | 138826 | 142993 | C $\epsilon$ |
| 355.2                     | 149874 | 153819 | C $\alpha$   |
